# Supplementary material
Source: PubMed Central journal article supplement (PMC3928289)
Supplement: NIHMS547972-supplement-supplement_1.pdf [file NIHMS547972-supplement-supplement_1.pdf]

**Supplementary Table 3: Number of cases and controls, pooled odds ratios and 95% confidence intervals for height by sex and NHL subtype.**

| Height Quintile <sup>a</sup>              | Controls    | NHL <sup>b</sup>       | OR <sup>c</sup> | 95% CI    | DLBCL <sup>b</sup>     | OR <sup>c</sup> | 95% CI    | FL <sup>b</sup>        | OR <sup>c</sup> | 95% CI    | CLL/SLL <sup>b</sup>   | OR <sup>c</sup> | 95% CI    |
|-------------------------------------------|-------------|------------------------|-----------------|-----------|------------------------|-----------------|-----------|------------------------|-----------------|-----------|------------------------|-----------------|-----------|
| <i>Males:</i>                             | 9453        | 5928                   |                 |           | 1857                   |                 |           | 1090                   |                 |           | 1084                   |                 |           |
| -20%                                      | 2191        | 1371                   | 0.97            | 0.87-1.08 | 439                    | 1.05            | 0.89-1.24 | 255                    | 1.11            | 0.89-1.35 | 250                    | 0.87            | 0.71-1.08 |
| -40%                                      | 2120        | 1213                   | 1.00            | 0.90-1.12 | 393                    | 1.10            | 0.93-1.30 | 229                    | 1.13            | 0.90-1.38 | 221                    | 0.94            | 0.76-1.17 |
| <b>-60%</b>                               | <b>1634</b> | <b>1047</b>            | <b>1</b>        | -         | <b>305</b>             | <b>1</b>        | -         | <b>171</b>             | <b>1</b>        | -         | <b>221</b>             | <b>1</b>        | -         |
| -80%                                      | 1711        | 1115                   | 1.10            | 0.98-1.23 | 358                    | 1.16            | 0.98-1.38 | 193                    | 1.09            | 0.87-1.36 | 197                    | 1.08            | 0.87-1.35 |
| -100%                                     | 1523        | 985                    | 1.19            | 1.06-1.34 | 297                    | 1.19            | 1.00-1.43 | 209                    | 1.47            | 1.18-1.84 | 162                    | 1.16            | 0.92-1.46 |
| Missing                                   | 274         | 197                    |                 |           | 65                     |                 |           | 33                     |                 |           | 33                     |                 |           |
| <i>Test for heterogeneity<sup>d</sup></i> |             | $\chi^2=93.6$ $p=0.04$ |                 |           | $\chi^2=91.3$ $p=0.06$ |                 |           | $\chi^2=67.5$ $p=0.50$ |                 |           | $\chi^2=65.6$ $p=0.13$ |                 |           |
| <i>Females:</i>                           | 7054        | 4516                   |                 |           | 1406                   |                 |           | 1174                   |                 |           | 661                    |                 |           |
| -20%                                      | 1708        | 1068                   | 0.92            | 0.82-1.03 | 347                    | 0.95            | 0.80-1.14 | 274                    | 0.88            | 0.73-1.07 | 145                    | 0.72            | 0.56-0.93 |
| -40%                                      | 1329        | 879                    | 1.00            | 0.88-1.13 | 254                    | 0.91            | 0.75-1.11 | 234                    | 0.99            | 0.81-1.22 | 137                    | 0.94            | 0.72-1.22 |
| <b>-60%</b>                               | <b>1444</b> | <b>903</b>             | <b>1</b>        | -         | <b>270</b>             | <b>1</b>        | -         | <b>240</b>             | <b>1</b>        | -         | <b>141</b>             | <b>1</b>        | -         |
| -80%                                      | 1203        | 793                    | 1.04            | 0.92-1.18 | 260                    | 1.08            | 0.89-1.30 | 195                    | 0.94            | 0.76-1.16 | 102                    | 0.81            | 0.61-1.07 |
| -100%                                     | 1134        | 698                    | 1.00            | 0.87-1.14 | 223                    | 0.98            | 0.80-1.19 | 193                    | 1.01            | 0.82-1.25 | 101                    | 0.94            | 0.71-1.25 |
| Missing                                   | 236         | 175                    |                 |           | 52                     |                 |           | 38                     |                 |           | 35                     |                 |           |
| <i>Test for heterogeneity<sup>d</sup></i> |             | $\chi^2=82.5$ $p=0.19$ |                 |           | $\chi^2=66.1$ $p=0.67$ |                 |           | $\chi^2=70.9$ $p=0.38$ |                 |           | $\chi^2=57.7$ $p=0.30$ |                 |           |

  

| Height Quintile <sup>a</sup>              | Controls    | MZBCL <sup>b</sup>     | OR <sup>c</sup> | 95% CI    | MCL <sup>b</sup>       | OR <sup>c</sup> | 95% CI    | Burkitt <sup>b</sup>    | OR <sup>c</sup> | 95% CI    | Other BCL <sup>b</sup>  | OR <sup>c</sup> | 95% CI    | TCL <sup>b</sup>       | OR <sup>c</sup> | 95% CI    |
|-------------------------------------------|-------------|------------------------|-----------------|-----------|------------------------|-----------------|-----------|-------------------------|-----------------|-----------|-------------------------|-----------------|-----------|------------------------|-----------------|-----------|
| <i>Males:</i>                             | 9453        | 366                    |                 |           | 289                    |                 |           | 66                      |                 |           | 233                     |                 |           | 291                    |                 |           |
| -20%                                      | 2191        | 81                     | 0.93            | 0.66-1.31 | 81                     | 1.12            | 0.79-1.59 | 9                       | 0.74            | 0.28-1.95 | 43                      | 0.76            | 0.49-1.16 | 63                     | 0.90            | 0.61-1.32 |
| -40%                                      | 2120        | 81                     | 1.18            | 0.84-1.67 | 44                     | 0.77            | 0.51-1.16 | 15                      | 1.20            | 0.50-2.88 | 40                      | 0.85            | 0.55-1.31 | 52                     | 0.83            | 0.55-1.24 |
| <b>-60%</b>                               | <b>1634</b> | <b>62</b>              | <b>1</b>        | -         | <b>57</b>              | <b>1</b>        | -         | <b>8</b>                | <b>1</b>        | -         | <b>49</b>               | <b>1</b>        | -         | <b>49</b>              | <b>1</b>        | -         |
| -80%                                      | 1711        | 64                     | 1.08            | 0.75-1.56 | 62                     | 1.25            | 0.86-1.82 | 14                      | 1.25            | 0.52-3.02 | 42                      | 1.10            | 0.71-1.69 | 70                     | 1.21            | 0.83-1.78 |
| -100%                                     | 1523        | 62                     | 1.37            | 0.95-1.98 | 38                     | 1.02            | 0.66-1.56 | 16                      | 1.66            | 0.70-3.93 | 54                      | 1.71            | 1.14-2.58 | 36                     | 0.77            | 0.49-1.20 |
| Missing                                   | 274         | 16                     |                 |           | 7                      |                 |           | 4                       |                 |           | 5                       |                 |           | 21                     |                 |           |
| <i>Test for heterogeneity<sup>d</sup></i> |             | $\chi^2=48.8$ $p=0.44$ |                 |           | $\chi^2=59.1$ $p=0.05$ |                 |           | $\chi^2=13.0$ $p=0.67$  |                 |           | $\chi^2=28.5$ $p=0.49$  |                 |           | $\chi^2=37.5$ $p=0.88$ |                 |           |
| <i>Females:</i>                           | 7054        | 361                    |                 |           | 101                    |                 |           | 30                      |                 |           | 170                     |                 |           | 185                    |                 |           |
| -20%                                      | 1708        | 92                     | 1.05            | 0.77-1.45 | 30                     | 1.14            | 0.65-2.02 | 3                       | 0.26            | 0.07-1.01 | 30                      | 0.87            | 0.51-1.47 | 37                     | 0.83            | 0.52-1.33 |
| -40%                                      | 1329        | 67                     | 1.20            | 0.85-1.69 | 18                     | 1.00            | 0.52-1.90 | 7                       | 0.63            | 0.22-1.82 | 32                      | 1.31            | 0.78-2.20 | 41                     | 1.26            | 0.79-2.01 |
| <b>-60%</b>                               | <b>1444</b> | <b>77</b>              | <b>1</b>        | -         | <b>21</b>              | <b>1</b>        | -         | <b>8</b>                | <b>1</b>        | -         | <b>30</b>               | <b>1</b>        | -         | <b>37</b>              | <b>1</b>        | -         |
| -80%                                      | 1203        | 66                     | 1.29            | 0.91-1.83 | 17                     | 1.01            | 0.52-1.95 | 4                       | 0.40            | 0.12-1.36 | 43                      | 1.87            | 1.14-3.05 | 28                     | 0.99            | 0.60-1.66 |
| -100%                                     | 1134        | 48                     | 0.97            | 0.67-1.42 | 12                     | 0.87            | 0.42-1.79 | 7                       | 0.69            | 0.24-1.98 | 29                      | 1.52            | 0.89-2.59 | 26                     | 0.87            | 0.52-1.46 |
| Missing                                   | 236         | 11                     |                 |           | 3                      |                 |           | 1                       |                 |           | 6                       |                 |           | 16                     |                 |           |
| <i>Test for heterogeneity<sup>d</sup></i> |             | $\chi^2=52.0$ $p=0.19$ |                 |           | $\chi^2=24.1$ $p=0.57$ |                 |           | $\chi^2=17.8$ $p=0.003$ |                 |           | $\chi^2=39.8$ $p=0.004$ |                 |           | $\chi^2=24.0$ $p=0.98$ |                 |           |

<sup>a</sup>Quintiles derived from study-sex-specific distributions of height among controls. <sup>b</sup>NHL: non-Hodgkin lymphoma; DLBCL: diffuse large B-cell lymphoma; FL: follicular lymphoma; CLL/SLL: chronic lymphocytic leukaemia/ small lymphocytic lymphoma; MZBCL: marginal zone B-cell lymphoma; MCL: mantle cell lymphoma; Burkitt:

DOI: 10.1002/ijc.23344

Burkitt lymphoma; Other BCL: other B-cell lymphoma; TCL: T-cell lymphoma. <sup>c</sup>Odds ratios and 95% confidence intervals adjusted for study, age and race were estimated using unconditional logistic regression. <sup>d</sup>Test for heterogeneity was conducted by testing for evidence of interaction between height and studies using the likelihood ratio test.

**Supplementary Figure 1(a): Meta-analysis of the risk of DLBCL associated with BMI <18.5 kg m<sup>-2</sup> (Underweight) compared to BMI 18.5-24.99 kg m<sup>-2</sup> (Normal weight).**

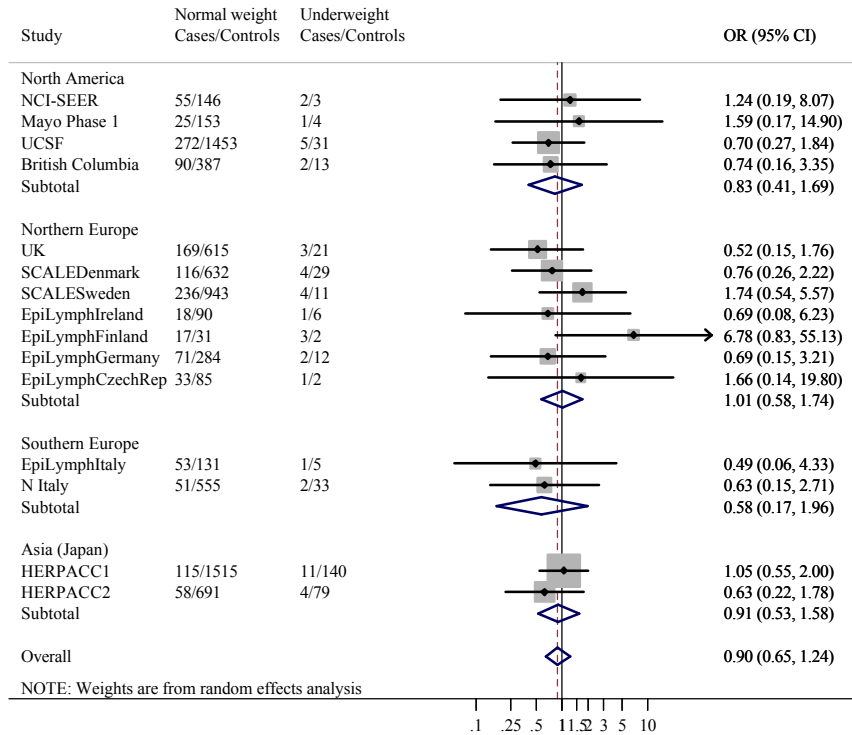

Test for heterogeneity:  $Q=7.99$ ,  $p=0.89$ ; Variation in odds ratios (OR) attributable to heterogeneity:  $I^2=0.0\%$ . For continents: North America:  $Q=0.64$ ,  $p=0.89$ ,  $I^2=0.0\%$ ; Northern Europe:  $Q=5.94$ ,  $p=0.43$ ,  $I^2=0.0\%$ ; Southern Europe:  $Q=0.03$ ,  $p=0.85$ ,  $I^2=0.0\%$ ; Asia (Japan):  $Q=0.68$ ,  $p=0.41$ ,  $I^2=0.0\%$ . Test for heterogeneity between continents:  $Q=0.70$ ,  $p=0.87$ . Pooled odds ratios by study design were: Population-based studies: OR=0.80, 95% CI 0.51-1.27,  $Q=2.74$ ,  $p=0.91$ ,  $I^2=0.0\%$ ; Clinic-based studies: OR=0.94, 95% CI 0.55-1.60,  $Q=0.90$ ,  $p=0.64$ ,  $I^2=0.0\%$ ; Hospital-based studies: OR=1.30, 95% CI 0.43-3.88,  $Q=3.68$ ,  $p=0.30$ ,  $I^2=18.5\%$ . Test for heterogeneity between study designs:  $Q=0.67$ ,  $p=0.72$ .

**Supplementary Figure 1(b): Meta-analysis of the risk of DLBCL associated with BMI 25-29.99 kg m<sup>-2</sup> (Grade 1 overweight) compared to BMI 18.5-24.99 kg m<sup>-2</sup> (Normal weight).**

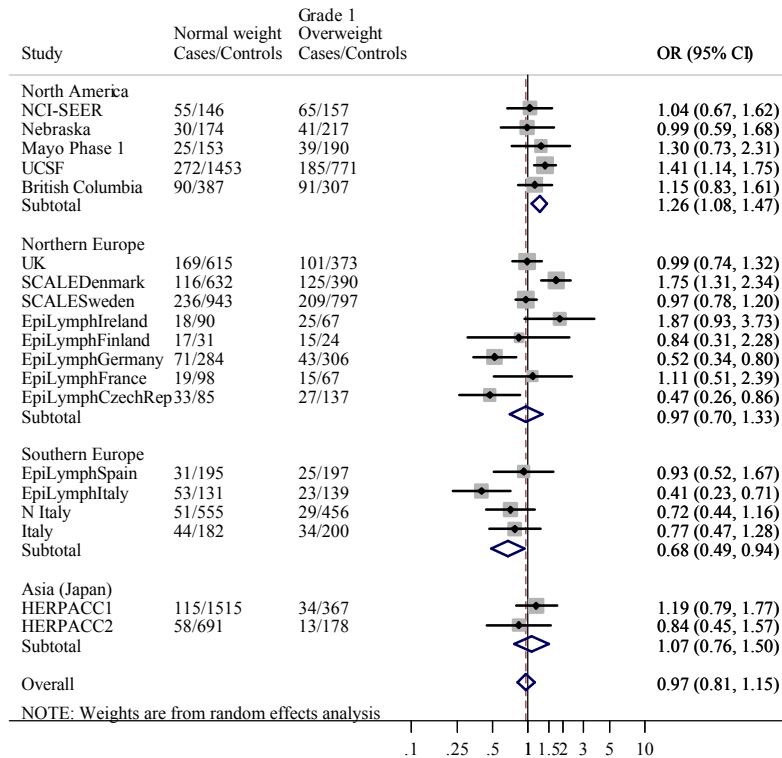

Test for heterogeneity:  $Q=56.5$ ,  $p<0.001$ ; Variation in odds ratios (OR) attributable to heterogeneity:  $I^2=68.1\%$ . For continents: North America:  $Q=2.84$ ,  $p=0.58$ ,  $I^2=0.0\%$ ; Northern Europe:  $Q=32.4$ ,  $p<0.001$ ,  $I^2=78.4\%$ ; Southern Europe:  $Q=4.62$ ,  $p=0.20$ ,  $I^2=35.0\%$ ; Asia (Japan):  $Q=0.83$ ,  $p=0.36$ ,  $I^2=0.0\%$ . Test for heterogeneity between continents:  $Q=15.8$ ,  $p=0.001$ . Pooled odds ratios by study design were: Population-based studies: OR=0.99, 95% CI 0.77-1.26,  $Q=40.8$ ,  $p<0.001$ ,  $I^2=80.4\%$ ; Clinic-based studies: OR=1.13, 95% CI 0.84-1.51,  $Q=1.15$ ,  $p=0.56$ ,  $I^2=0.0\%$ ; Hospital-based studies: OR=0.85, 95% CI 0.63-1.15,  $Q=9.81$ ,  $p=0.13$ ,  $I^2=38.8\%$ . Test for heterogeneity between study designs:  $Q=4.70$ ,  $p=0.10$ .

**Supplementary Figure 1(c): Meta-analysis of the risk of DLBCL associated with BMI 30-39.99 kg m<sup>-2</sup> (Grade 2 obese) compared to BMI 18.5-24.99 kg m<sup>-2</sup> (Normal weight).**

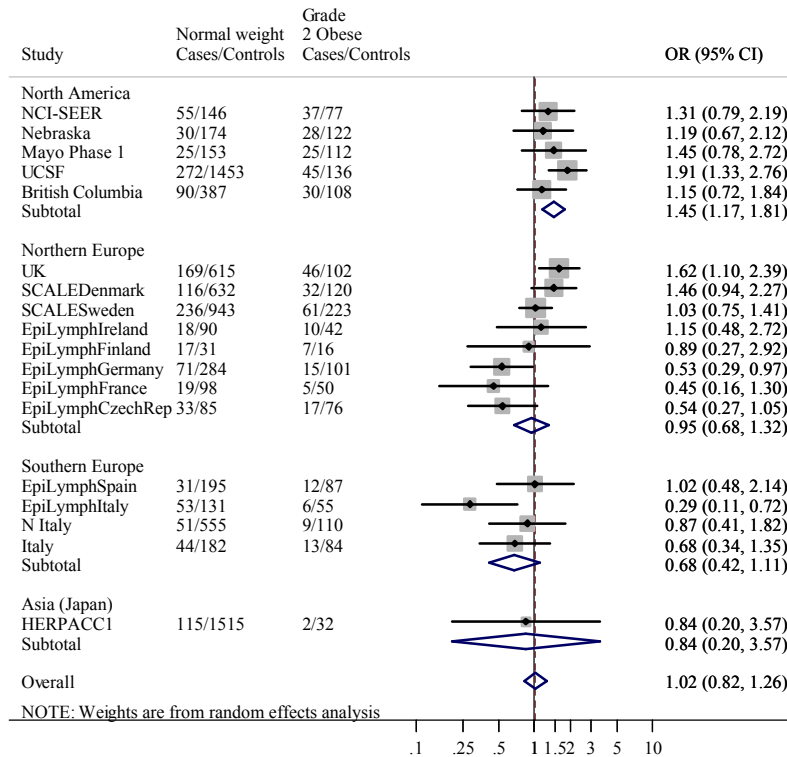

Test for heterogeneity:  $Q=38.8$ ,  $p=0.002$ ; Variation in odds ratios (OR) attributable to heterogeneity:  $I^2=56.1\%$ . For continents: North America:  $Q=3.74$ ,  $p=0.44$ ,  $I^2=0.0\%$ ; Northern Europe:  $Q=18.1$ ,  $p=0.01$ ,  $I^2=61.3\%$ ; Southern Europe:  $Q=4.86$ ,  $p=0.18$ ,  $I^2=38.2\%$ ; Asia (Japan): no test for heterogeneity as only one study. Test for heterogeneity between continents:  $Q=12.1$ ,  $p=0.007$ . Pooled odds ratios by study design were: Population-based studies: OR=1.13, 95% CI 0.85-1.51,  $Q=26.3$ ,  $p=0.001$ ,  $I^2=69.6\%$ ; Clinic-based studies: OR=1.34, 95% CI 0.75-2.37,  $Q=0.46$ ,  $p=0.50$ ,  $I^2=0.0\%$ ; Hospital-based studies: OR=0.76, 95% CI 0.56-1.02,  $Q=3.70$ ,  $p=0.72$ ,  $I^2=0.0\%$ . Test for heterogeneity between study designs:  $Q=8.32$ ,  $p=0.016$ .

**Supplementary Figure 1(d): Meta-analysis of the risk of DLBCL associated with BMI  $\geq 40$  kg m<sup>-2</sup> (Grade 3 obese) compared to BMI 18.5-24.99 kg m<sup>-2</sup> (Normal weight).**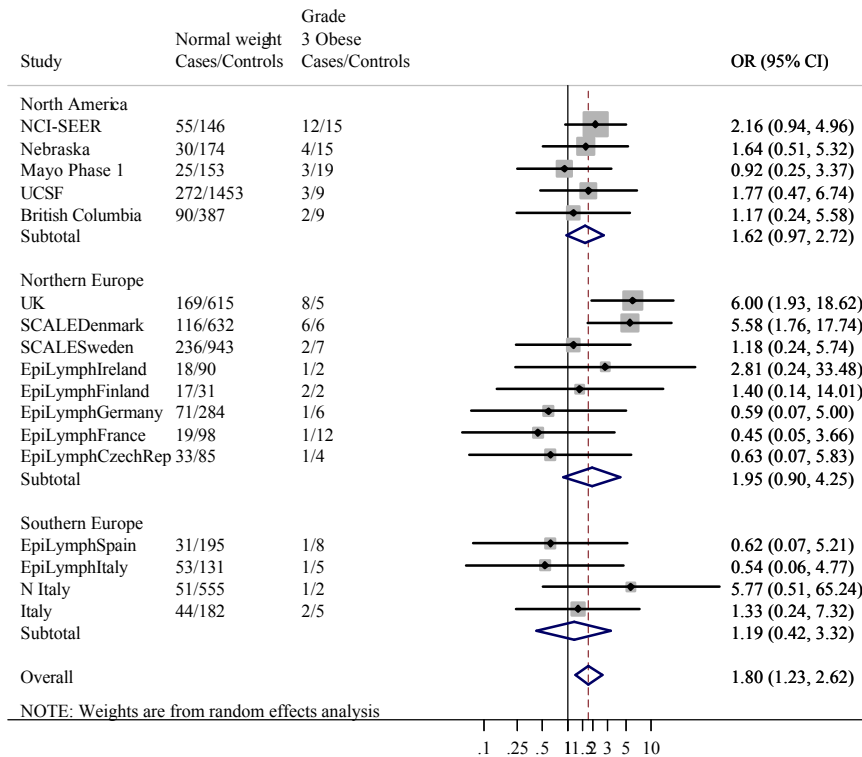

Test for heterogeneity:  $Q=16.7$ ,  $p=0.40$ ; Variation in odds ratios (OR) attributable to heterogeneity:  $I^2=4.4\%$ . For continents: North America:  $Q=1.38$ ,  $p=0.85$ ,  $I^2=0.0\%$ ; Northern Europe:  $Q=11.1$ ,  $p=0.14$ ,  $I^2=36.7\%$ ; Southern Europe:  $Q=2.51$ ,  $p=0.47$ ,  $I^2=0.0\%$ . Test for heterogeneity between continents:  $Q=1.78$ ,  $p=0.41$ . Pooled odds ratios by study design were: Population-based studies: OR=2.13, 95% CI 1.30-3.49,  $Q=10.1$ ,  $p=0.27$ ,  $I^2=21.0\%$ ; Clinic-based studies: OR=0.92, 95% CI 0.25-3.37, no test for heterogeneity as only one study; Hospital-based studies: OR=1.18, 95% CI 0.52-2.65,  $Q=3.64$ ,  $p=0.72$ ,  $I^2=0.0\%$ . Test for heterogeneity between study designs:  $Q=2.97$ ,  $p=0.23$ .

**Supplementary Figure 2: Meta-analysis of the risk of DLBCL associated with 5 kg m<sup>-2</sup> increase in BMI above 18.5 kg m<sup>-2</sup> (Normal weight and above).**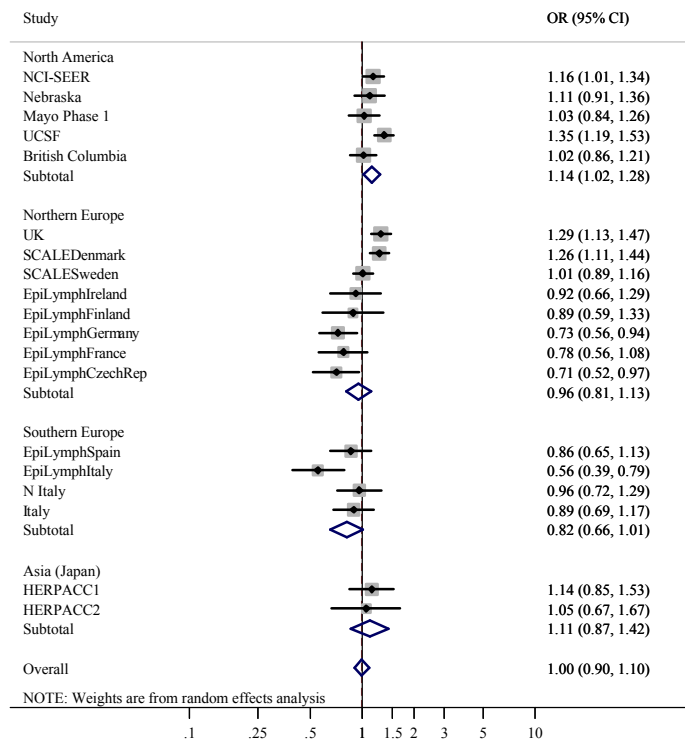

Test for heterogeneity:  $Q=67.6$ ,  $p<0.001$ ; Variation in odds ratios (OR) attributable to heterogeneity:  $I^2=73.4\%$ . For continents: North America:  $Q=8.88$ ,  $p=0.06$ ,  $I^2=55.0\%$ ; Northern Europe:  $Q=35.0$ ,  $p<0.001$ ,  $I^2=80.0\%$ ; Southern Europe:  $Q=6.45$ ,  $p=0.09$ ,  $I^2=53.5\%$ ; Asia (Japan):  $Q=0.07$ ,  $p=0.79$ ,  $I^2=0.0\%$ . Test for heterogeneity between continents:  $Q=17.1$ ,  $p=0.001$ . Pooled odds ratios by study design were: Population-based studies: OR=1.06, 95% CI 0.93-1.21,  $Q=45.2$ ,  $p<0.001$ ,  $I^2=82.3\%$ ; Clinic-based studies: OR=1.06, 95% CI 0.91-1.24,  $Q=0.29$ ,  $p=0.86$ ,  $I^2=0.0\%$ ; Hospital-based studies: OR=0.86, 95% CI 0.76-0.96,  $Q=2.65$ ,  $p=0.85$ ,  $I^2=0.0\%$ . Test for heterogeneity between study designs:  $Q=19.4$ ,  $p<0.001$ .

**Supplementary Figure 3(a): Meta-analysis of the risk of Follicular lymphoma associated with BMI <18.5 kg m<sup>-2</sup> (Underweight) compared to BMI 18.5-24.99 kg m<sup>-2</sup> (Normal weight).**

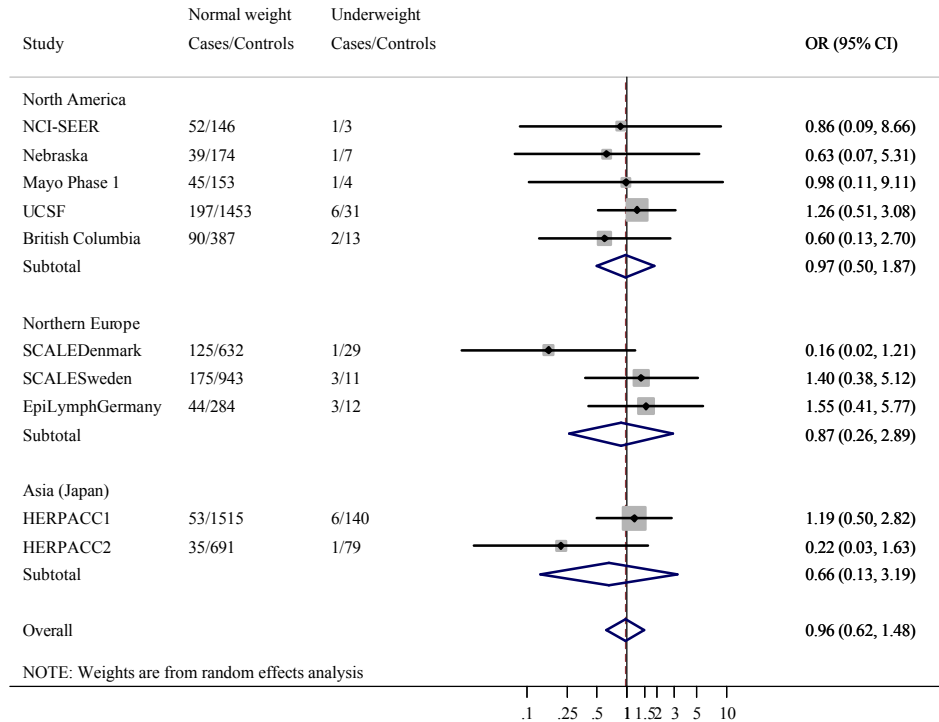

Test for heterogeneity:  $Q=7.05$ ,  $p=0.63$ ; Variation in odds ratios (OR) attributable to heterogeneity:  $I^2=0.0\%$ . For continents: North America:  $Q=0.89$ ,  $p=0.93$ ,  $I^2=0.0\%$ ; Northern Europe:  $Q=3.83$ ,  $p=0.15$ ,  $I^2=47.8\%$ ; Asia (Japan):  $Q=2.30$ ,  $p=0.13$ ,  $I^2=56.6\%$ . Test for heterogeneity between continents:  $Q=0.03$ ,  $p=0.99$ . Pooled odds ratios by study design were: Population-based studies: OR=0.98, 95% CI 0.57-1.67,  $Q=4.73$ ,  $p=0.58$ ,  $I^2=0.0\%$ ; Clinic-based studies: OR=0.86, 95% CI 0.35-2.08,  $Q=2.31$ ,  $p=0.32$ ,  $I^2=13.3\%$ ; no hospital-based studies contributed data to this meta-analysis. Test for heterogeneity between study designs:  $Q=0.02$ ,  $p=0.89$ .



**Supplementary Figure 3(b): Meta-analysis of the risk of Follicular lymphoma associated with BMI 25-29.99 kg m<sup>-2</sup> (Grade 1 overweight) compared to BMI 18.5-24.99 kg m<sup>-2</sup> (Normal weight).**

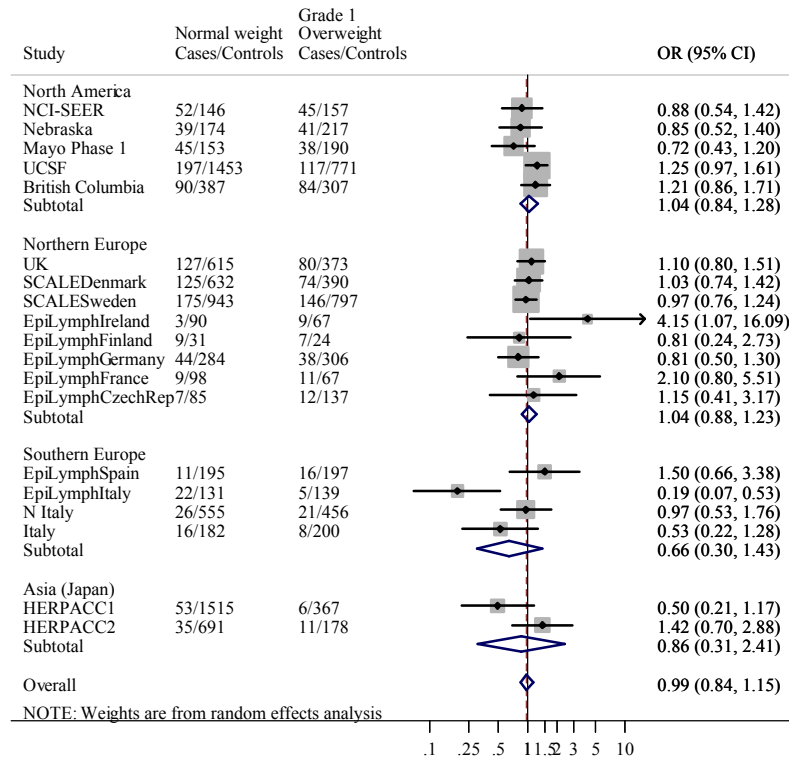

Test for heterogeneity:  $Q=30.8$ ,  $p=0.03$ ; Variation in odds ratios (OR) attributable to heterogeneity:  $I^2=41.5\%$ . For continents: North America:  $Q=5.78$ ,  $p=0.22$ ,  $I^2=30.7\%$ ; Northern Europe:  $Q=7.69$ ,  $p=0.36$ ,  $I^2=9.0\%$ ; Southern Europe:  $Q=11.0$ ,  $p=0.01$ ,  $I^2=72.6\%$ ; Asia (Japan):  $Q=3.43$ ,  $p=0.06$ ,  $I^2=70.9\%$ . Test for heterogeneity between continents:  $Q=2.92$ ,  $p=0.40$ . Pooled odds ratios by study design were: Population-based studies: OR=0.98, 95% CI 0.83-1.17,  $Q=16.0$ ,  $p=0.043$ ,  $I^2=49.9\%$ ; Clinic-based studies: OR=0.81, 95% CI 0.47-1.40,  $Q=3.85$ ,  $p=0.15$ ,  $I^2=48.1\%$ ; Hospital-based studies: OR=1.19, 95% CI 0.78-1.83,  $Q=8.94$ ,  $p=0.18$ ,  $I^2=32.9\%$ . Test for heterogeneity between study designs:  $Q=2.02$ ,  $p=0.36$ .

**Supplementary Figure 3(c): Meta-analysis of the risk of Follicular lymphoma associated with BMI 30-39.99 kg m<sup>-2</sup> (Grade 2 obese) compared to BMI 18.5-24.99 kg m<sup>-2</sup> (Normal weight).**

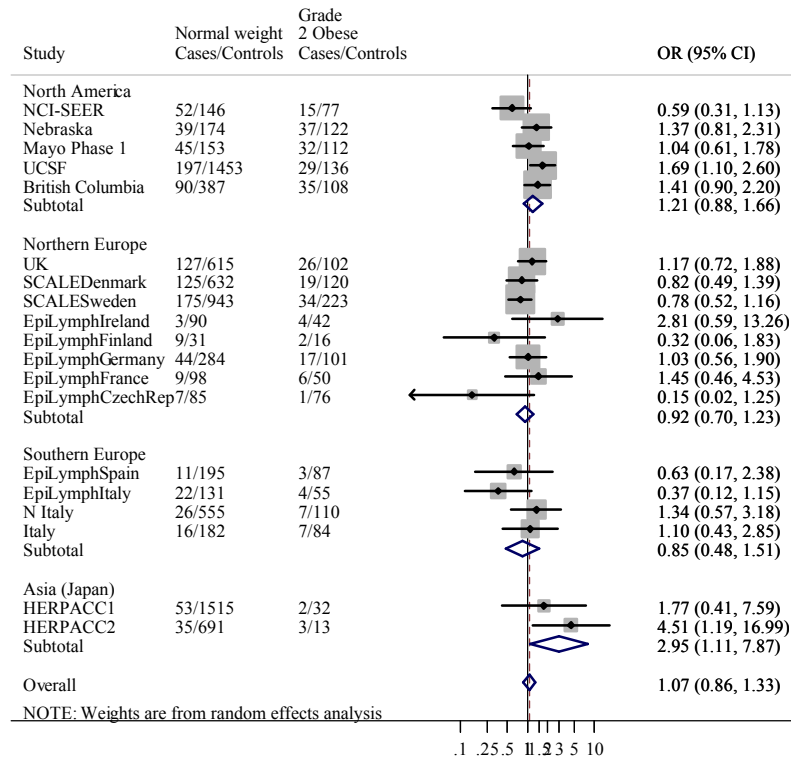

Test for heterogeneity:  $Q=29.4$ ,  $p=0.04$ ; Variation in odds ratios (OR) attributable to heterogeneity:  $I^2=38.9\%$ . For continents: North America:  $Q=7.79$ ,  $p=0.10$ ,  $I^2=48.7\%$ ; Northern Europe:  $Q=8.75$ ,  $p=0.27$ ,  $I^2=20.0\%$ ; Southern Europe:  $Q=3.64$ ,  $p=0.30$ ,  $I^2=17.6\%$ ; Asia (Japan):  $Q=0.86$ ,  $p=0.35$ ,  $I^2=0.0\%$ . Test for heterogeneity between continents:  $Q=8.40$ ,  $p=0.04$ . Pooled odds ratios by study design were: Population-based studies: OR=1.03, 95% CI 0.80-1.33,  $Q=16.7$ ,  $p=0.033$ ,  $I^2=52.2\%$ ; Clinic-based studies: OR=1.73, 95% CI 0.71-4.20,  $Q=4.20$ ,  $p=0.12$ ,  $I^2=52.3\%$ ; Hospital-based studies: OR=0.99, 95% CI 0.58-1.70,  $Q=7.75$ ,  $p=0.26$ ,  $I^2=22.6\%$ . Test for heterogeneity between study designs:  $Q=0.77$ ,  $p=0.68$ .

**Supplementary Figure 3(d): Meta-analysis of the risk of Follicular lymphoma associated with BMI  $\geq 40$  kg m<sup>-2</sup> (Grade 3 obese) compared to BMI 18.5-24.99 kg m<sup>-2</sup> (Normal weight).**

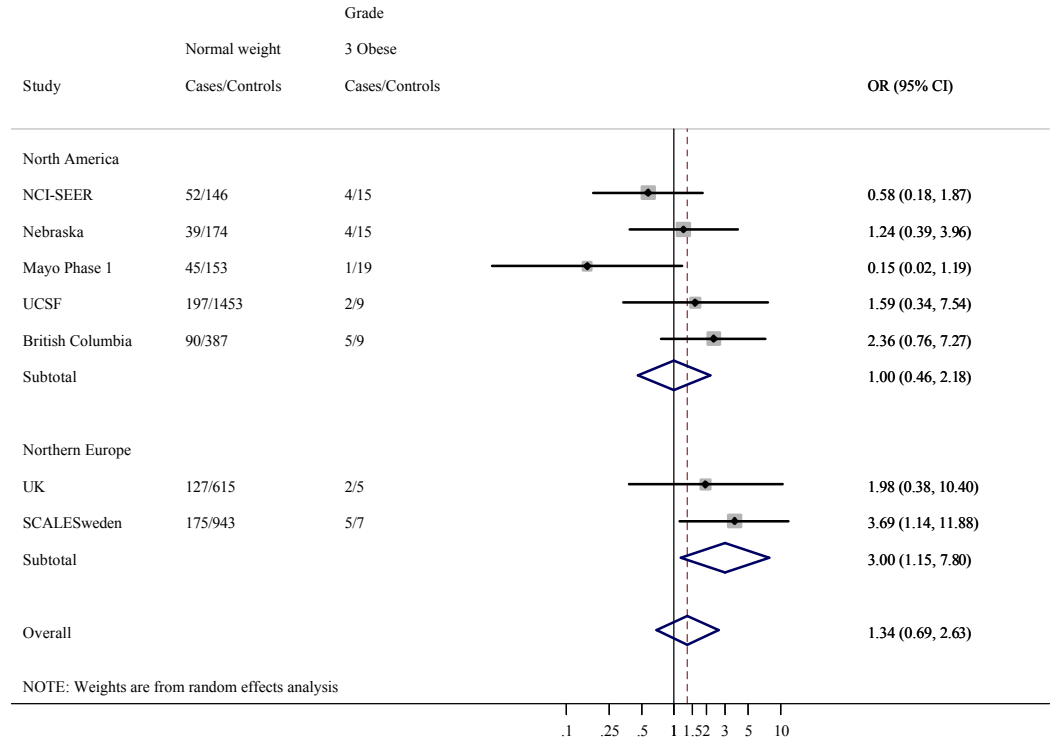

Test for heterogeneity:  $Q=10.3$ ,  $p=0.11$ ; Variation in odds ratios (OR) attributable to heterogeneity:  $I^2=41.8\%$ . For continents: North America:  $Q=6.69$ ,  $p=0.15$ ,  $I^2=40.2\%$ ; Northern Europe:  $Q=0.36$ ,  $p=0.55$ ,  $I^2=0.0\%$ . Test for heterogeneity between continents:  $Q=3.27$ ,  $p=0.07$ . Pooled odds ratios by study design were: Population-based studies: OR=1.63, 95% CI 0.94-2.81,  $Q=5.53$ ,  $p=0.35$ ,  $I^2=9.6\%$ ; Clinic-based studies: OR=0.16, 95% CI 0.02-1.20, no test for heterogeneity as only one study; no hospital-based studies contributed data to this meta-analysis. Test for heterogeneity between study designs:  $Q=4.78$ ,  $p=0.029$ .

**Supplementary Figure 4(a): Meta-analysis of the risk of CLL/SLL associated with BMI <18.5 kg m<sup>-2</sup> (Underweight) compared to BMI 18.5-24.99 kg m<sup>-2</sup> (Normal weight).**

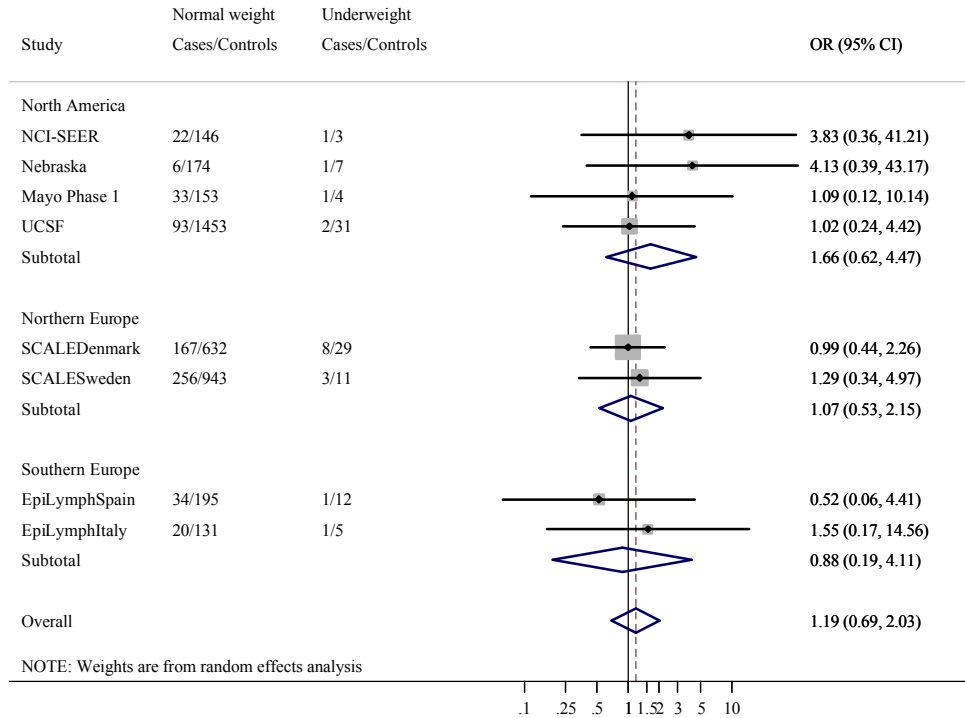

Test for heterogeneity:  $Q=2.89$ ,  $p=0.90$ ; Variation in odds ratios (OR) attributable to heterogeneity:  $I^2=0.0\%$ . For continents: North America:  $Q=1.61$ ,  $p=0.66$ ,  $I^2=0.0\%$ ; Northern Europe:  $Q=0.11$ ,  $p=0.74$ ,  $I^2=0.0\%$ ; Southern Europe:  $Q=0.48$ ,  $p=0.49$ ,  $I^2=0.0\%$ . Test for heterogeneity between continents:  $Q=0.69$ ,  $p=0.71$ . Pooled odds ratios by study design were: Population-based studies: OR=1.27, 95% CI 0.72-2.25,  $Q=2.26$ ,  $p=0.81$ ,  $I^2=0.0\%$ ; Clinic-based studies: OR=1.09, 95% CI 0.12-10.1, no test for heterogeneity as only one study; Hospital-based studies: OR=0.52, 95% CI 0.06-4.41, no test for heterogeneity as only one study. Test for heterogeneity between study designs:  $Q=0.63$ ,  $p=0.73$ .

**Supplementary Figure 4(b): Meta-analysis of the risk of CLL/SLL associated with BMI 25-29.99 kg m<sup>-2</sup> (Grade 1 overweight) compared to BMI 18.5-24.99 kg m<sup>-2</sup> (Normal weight).**

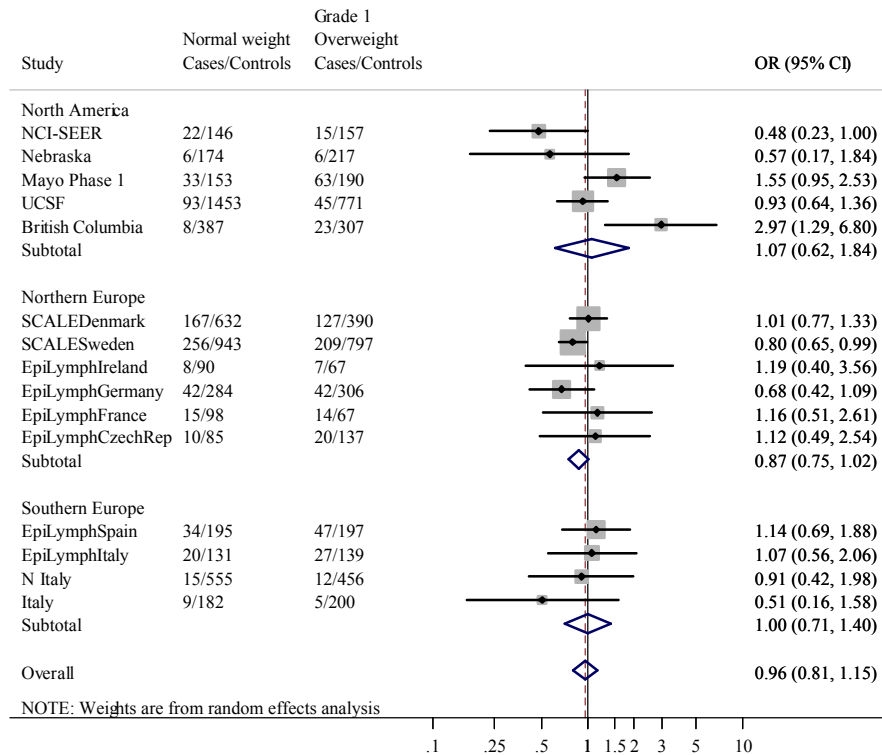

Test for heterogeneity:  $Q=21.9$ ,  $p=0.081$ ; Variation in odds ratios (OR) attributable to heterogeneity:  $I^2=36.1\%$ . For continents: North America:  $Q=14.3$ ,  $p=0.006$ ,  $I^2=72.0\%$ ; Northern Europe:  $Q=3.90$ ,  $p=0.57$ ,  $I^2=0.0\%$ ; Southern Europe:  $Q=1.71$ ,  $p=0.64$ ,  $I^2=0.0\%$ . Test for heterogeneity between continents:  $Q=2.03$ ,  $p=0.36$ . Pooled odds ratios by study design were: Population-based studies: OR=0.89, 95% CI 0.70-1.13,  $Q=14.7$ ,  $p=0.040$ ,  $I^2=52.4\%$ ; Clinic-based studies: OR=1.55, 95% CI 0.95-2.53, no test for heterogeneity as only one study; Hospital-based studies: OR=1.03, 95% CI 0.76-1.41,  $Q=1.91$ ,  $p=0.86$ ,  $I^2=0.0\%$ . Test for heterogeneity between study designs:  $Q=5.29$ ,  $p=0.071$ .

**Supplementary Figure 4(c): Meta-analysis of the risk of CLL/SLL associated with BMI 30-39.99 kg m<sup>-2</sup> (Grade 2 obese) compared to BMI 18.5-24.99 kg m<sup>-2</sup> (Normal weight).**

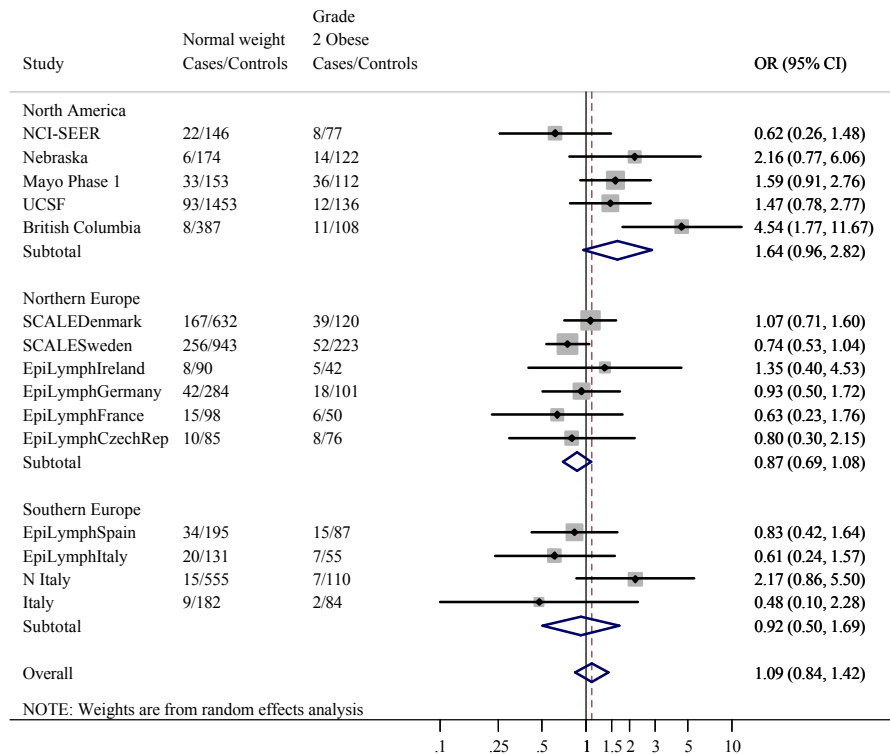

Test for heterogeneity:  $Q=26.3$ ,  $p=0.024$ ; Variation in odds ratios (OR) attributable to heterogeneity:  $I^2=46.8\%$ . For continents: North America:  $Q=9.62$ ,  $p=0.05$ ,  $I^2=58.4\%$ ; Northern Europe:  $Q=2.71$ ,  $p=0.74$ ,  $I^2=0.0\%$ ; Southern Europe:  $Q=4.79$ ,  $p=0.19$ ,  $I^2=37.4\%$ . Test for heterogeneity between continents:  $Q=9.19$ ,  $p=0.01$ . Pooled odds ratios by study design were: Population-based studies: OR=1.11, 95% CI 0.77-1.61,  $Q=18.7$ ,  $p=0.009$ ,  $I^2=62.6\%$ ; Clinic-based studies: OR=1.59, 95% CI 0.91-2.76, no test for heterogeneity as only one study; Hospital-based studies: OR=0.96, 95% CI 0.65-1.42,  $Q=4.99$ ,  $p=0.42$ ,  $I^2=0.0\%$ . Test for heterogeneity between study designs:  $Q=2.60$ ,  $p=0.27$ .

**Supplementary Figure 4(d): Meta-analysis of the risk of CLL/SLL associated with BMI  $\geq 40$  kg m<sup>-2</sup> (Grade 3 obese) compared to BMI 18.5-24.99 kg m<sup>-2</sup> (Normal weight).**

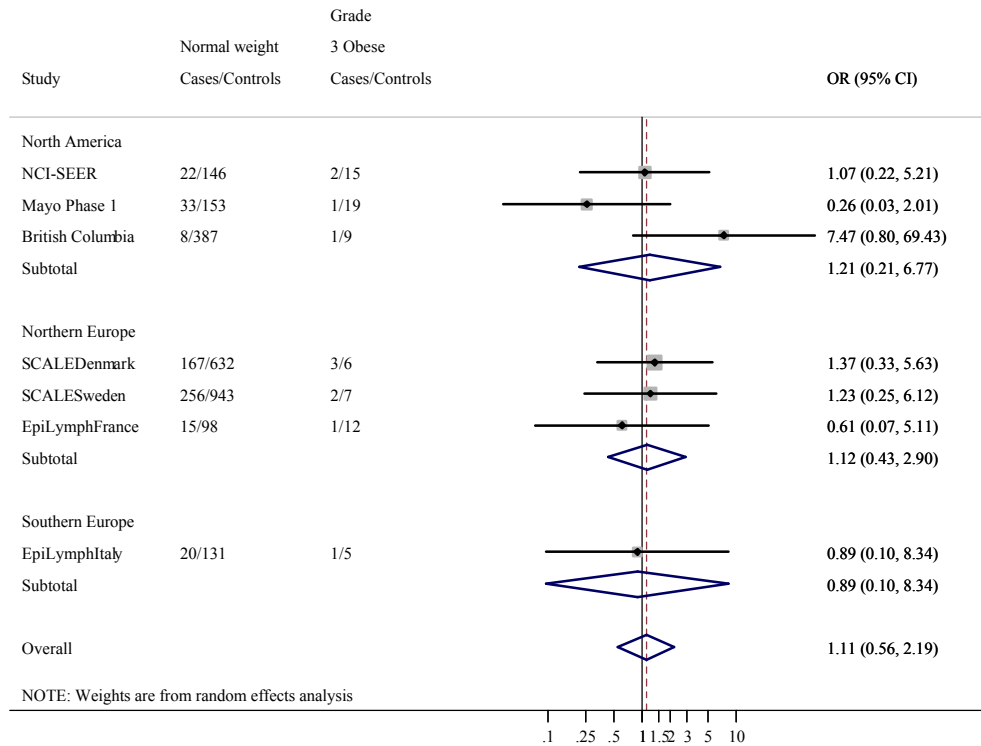

Test for heterogeneity:  $Q=5.19$ ,  $p=0.52$ ; Variation in odds ratios (OR) attributable to heterogeneity:  $I^2=0.0\%$ . For continents: North America:  $Q=4.75$ ,  $p=0.09$ ,  $I^2=57.9\%$ ; Northern Europe:  $Q=0.40$ ,  $p=0.82$ ,  $I^2=0.0\%$ ; Southern Europe: no test for heterogeneity as only one study. Test for heterogeneity between continents:  $Q=0.04$ ,  $p=0.98$ . Pooled odds ratios by study design were: Population-based studies: OR=1.47, 95% CI 0.68-3.16,  $Q=2.45$ ,  $p=0.65$ ,  $I^2=0.0\%$ ; Clinic-based studies: OR=0.26, 95% CI 0.03-2.01, no test for heterogeneity as only one study; Hospital-based studies: OR=0.61, 95% CI 0.07-5.11, no test for heterogeneity as only one study. Test for heterogeneity between study designs:  $Q=2.74$ ,  $p=0.25$ .

**Supplementary Table 4: Number of cases and controls, pooled odds ratios and 95% confidence intervals for body mass index by rarer NHL subtype.**

| BMI <sup>a</sup>                          | Controls<br>(N=16507) | MZBCL <sup>b</sup><br>(N=727) | OR <sup>c</sup>        | 95% CI    | MCL <sup>b</sup><br>(N=390) | OR <sup>c</sup> | 95% CI                 | Burkitt <sup>b</sup><br>(N=96) | OR <sup>c</sup> | 95% CI              | Other<br>BCL <sup>b</sup><br>(N=403) | OR <sup>c</sup> | 95% CI    | TCL <sup>b</sup><br>(N=476) | OR <sup>c</sup>        | 95% CI    |  |  |                        |  |  |  |
|-------------------------------------------|-----------------------|-------------------------------|------------------------|-----------|-----------------------------|-----------------|------------------------|--------------------------------|-----------------|---------------------|--------------------------------------|-----------------|-----------|-----------------------------|------------------------|-----------|--|--|------------------------|--|--|--|
| <i>WHO category (kg m<sup>-2</sup>):</i>  |                       |                               |                        |           |                             |                 |                        |                                |                 |                     |                                      |                 |           |                             |                        |           |  |  |                        |  |  |  |
| <18.5                                     | 424                   | 18                            | 1.06                   | 0.64-1.73 | 3                           | 0.67            | 0.21-2.15              | 5                              | 3.13            | 1.19-8.25           | 4                                    | 0.90            | 0.32-2.49 | 9                           | 0.90                   | 0.45-1.78 |  |  |                        |  |  |  |
| <b>18.5-24.99</b>                         | <b>8360</b>           | <b>347</b>                    | <b>1</b>               | -         | <b>152</b>                  | <b>1</b>        | -                      | <b>45</b>                      | <b>1</b>        | -                   | <b>182</b>                           | <b>1</b>        | -         | <b>211</b>                  | <b>1</b>               | -         |  |  |                        |  |  |  |
| 25-29.99                                  | 5340                  | 248                           | 0.99                   | 0.83-1.18 | 171                         | 1.12            | 0.89-1.41              | 31                             | 0.95            | 0.59-1.55           | 153                                  | 0.88            | 0.70-1.11 | 158                         | 1.10                   | 0.88-1.37 |  |  |                        |  |  |  |
| 30-39.99                                  | 1666                  | 77                            | 0.83                   | 0.64-1.08 | 53                          | 1.01            | 0.73-1.41              | 9                              | 0.78            | 0.37-1.65           | 50                                   | 0.81            | 0.58-1.13 | 55                          | 1.08                   | 0.79-1.49 |  |  |                        |  |  |  |
| ≥40                                       | 132                   | 9                             | 1.10                   | 0.55-2.22 | 1                           | 0.31            | 0.04-2.26              | 0                              | 0               | 0-3.64 <sup>d</sup> | 1                                    | 0.23            | 0.03-1.64 | 5                           | 1.01                   | 0.40-2.52 |  |  |                        |  |  |  |
| Missing                                   | 585                   | 28                            |                        |           | 10                          |                 |                        | 6                              |                 |                     | 13                                   |                 |           | 38                          |                        |           |  |  |                        |  |  |  |
| <i>Test for heterogeneity<sup>e</sup></i> |                       |                               | $\chi^2=46.5$ $p=0.09$ |           |                             |                 | $\chi^2=20.9$ $p=0.75$ |                                |                 |                     | $\chi^2=17.9$ $p=0.33$               |                 |           |                             | $\chi^2=14.8$ $p=0.79$ |           |  |  | $\chi^2=32.0$ $p=0.52$ |  |  |  |

<sup>a</sup>Body mass index grouped: using WHO categories where <18.5 kg m<sup>-2</sup> is considered Underweight; 18.5-24.99 kg m<sup>-2</sup> Normal weight; 25-29.99 kg m<sup>-2</sup> Grade 1 Overweight; 30-39.99 kg m<sup>-2</sup> Grade 2 Obese; and ≥40 kg m<sup>-2</sup> Grade 3 Obese. <sup>b</sup>MZBCL: marginal zone B-cell lymphoma; MCL: mantle cell lymphoma; Burkitt: Burkitt lymphoma; Other BCL: other B-cell lymphoma; TCL: T-cell lymphoma. <sup>c</sup>Odds ratios and 95% confidence intervals adjusted for study, sex, age, and race were estimated using unconditional logistic regression. <sup>d</sup>Confidence interval estimated using exact methods. <sup>e</sup>Test for heterogeneity was conducted by testing for evidence of interaction between BMI and studies using the likelihood ratio test.
